# Supplementary material for: Heterospecific Immunity Help to Sustain an Effective BK-virus Immune Response and Prevent BK-virus-associated Nephropathy
Source: Research Square preprint supplement (doi:10.21203/rs.3.rs-1650939/v1), 2022-05-26
Supplement: Supplementary file 1 [file 010235586155efd44a97eb8b.docx]

**Supplementary data: Table S1. Therapeutic management before and after BKvAN diagnosis**

| **Therapeutic management in the BKvAN group (*n*=25)** | Before BKvAN diagnosis | After BKvAN diagnosis | *pi* |
| --- | --- | --- | --- |
| Tacrolimus, n (%) | 21 (84) | 18 (72) | 0.496 |
| Levels of tacrolimus (ng/mL) | 8.7 [6.8-10.4] | 5.6 [4.7-6.5] | ***<0.0001*** |
| Antimetabolites, n (%) | 10 (40) | 6 (24) | 0.364 |
| Everolimus, n (%) | 5 (20) | 9 (36) | 0.345 |

BKvAN: patients with BKv-associated nephropathy; AUC: area under the curve; n: number of patients; *p: p*-values. Continuous data are expressed in medians and interquartile ranges. *(i)* p-values indicate the significance of the within-BKvAN group difference before and after BKvAN diagnosis, in Fisher’s exact test or Wilcoxon matched-pairs signed-rank tests.
