# Supplementary material for: Heterospecific Immunity Help to Sustain an Effective BK-virus Immune Response and Prevent BK-virus-associated Nephropathy
Source: Research Square preprint supplement (doi:10.21203/rs.3.rs-1650939/v1), 2022-05-26
Supplement: Supplementary file 6 [file 972d0b1cbb3de8667341208a.docx]

**Supplementary data: Table S4. Comparison of memory T-cell subpopulations in CD4 and CD8 T cells between KTR groups defined on the basis of BKv reactivation**

| **Memory T-cell subpopulations and inhibitory receptor expression**  **among CD4 and CD8 T cells** | Viruria | Viremia | BKvAN | *pi* |
| --- | --- | --- | --- | --- |
| n | 15 | 14 | 15 |  |
| CD4 T cells |  |  |  |  |
| TSCM (expressed in %) | 0.53 [0.34-1.18] | 0.71 [0.48-1.30] | 0.78 [0.22-1.87] | 0.592 |
| TCM (expressed in %) | 12.9 [7.86-19.5] | 7.62 [4.27-11.78] | 9.12 [5.16-15.6] | 0.198 |
| TEM (expressed in %) | 13.8 [9.06-16.2] | 11.2 [7.14-17] | 13.4 [3.85-20.3] | 0.731 |
| TEMRA (expressed in %) | 1.38 [0.75-2.89] | 0.68 [0.24-1.68] | 1.27 [0.69-3.04] | 0.132 |
| CD8 T cells |  |  |  |  |
| TSCM (expressed in %) | 0.64 [0.15-1.87] | 0.44 [0.26-1.27] | 0.54 [0.19-1.06] | 0.708 |
| TCM (expressed in %) | 1.52 [0.74-2.96] | 1.25 [0.47-1.69] | 1.44 [0.87-2.75] | 0.368 |
| TEM (expressed in %) | 9.06 [4.08-14.2] | 4.20 [3.01-9.22] | 7.66 [1.39-12.03] | 0.222 |
| TEMRA (expressed in %) | 21.8 [14.4-34.1] | 9.81 [3.62-12.88] | 7.31 [4.77-15.2] | ***0.0007*** |

Viruria: patients with urinary BKv reactivation; Viremia: patients with plasma BKv reactivation; BKvAN: patients with BKv-associated nephropathy; BKv: BK-virus; n: number of patients; *p: p*-values; CTLA4: cytotoxic T lymphocyte-associated protein 4; PD1: programmed cell death 1; TCM: central memory T cells; TEM: effector memory T cells; TEMRA: terminally differentiated effector T cells; TSCM: stem memory T cells. Continuous data are expressed in medians and interquartile ranges. *(i)* p-values indicate the significance of differences between groups in Kruskal-Wallis test.
