# Supplementary material for: Heterospecific Immunity Help to Sustain an Effective BK-virus Immune Response and Prevent BK-virus-associated Nephropathy
Source: Research Square preprint supplement (doi:10.21203/rs.3.rs-1650939/v1), 2022-05-26
Supplement: Supplementary file 8 [file e959686aa63b4a01a12377cd.docx]

**Supplementary data: Table S3. CEF-specific memory T-cell responses in KTR groups defined on the basis of BKv reactivation**

| **Assessment of antiviral T-cell responses** | Viruria | Viremia | BKvAN | *pi* |
| --- | --- | --- | --- | --- |
| CEF stimulation (n) | 10/10/5 | 10/10/5 | 10/9/5 |  |
| **Proliferative capacities:** CFSElow CD8 T cells (cell nb) | 4.81 [3.64-6.11] | 4.22 [0.10-6.13] | 3.85 [2.03-5.51] | 0.726 |
| **Cytokine secretion capacities:** TNF+ CD8 T cells (cell nb) | 0.03 [0.03-1.44] | 0.88 [0.03-2.46] | 0.03 [0.03-0.032] | 0.252 |
| **Cytokine secretion capacities:** TNF+/IFN+ CD8 T cells (cell nb) | 1.31 [0.50-3.90] | 1.42 [0.032-15.42] | 1.66 [0.03-3.46] | 0.936 |
| **Cytotoxic capacities:** 7AAD+ target cells (cell nb) | 20 [9.7-28.1] | 10.6 [6.9-22.95] | 17.4 [3.85-56.9] | 0.777 |

Viruria: patients with urinary BKv reactivation; Viremia: patients with plasma BKv reactivation; BKvAN: patients with BKv-associated nephropathy; BKv: BK-virus; CEF: pool of cytomegalovirus, Epstein Barr virus and influenza virus peptides; n: number of patients; cell nb: number of cells, *p: p*-values. Continuous data are expressed in medians and interquartile ranges. *(i)* p-values indicate the significance of differences between groups in Kruskal-Wallis test.
