# Supplementary figures and images for: Heterospecific Immunity Help to Sustain an Effective BK-virus Immune Response and Prevent BK-virus-associated Nephropathy
Source: Research Square preprint supplement (doi:10.21203/rs.3.rs-1650939/v1), 2022-05-26

# Supplementary data: Figure S2

**a**

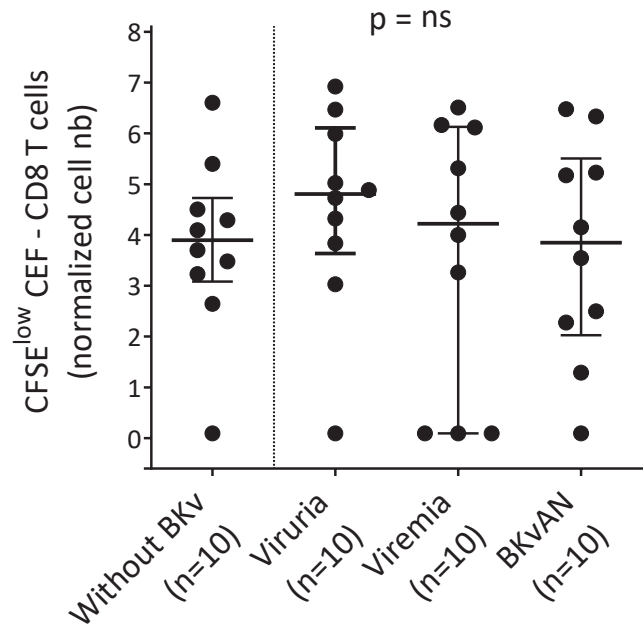

**b**

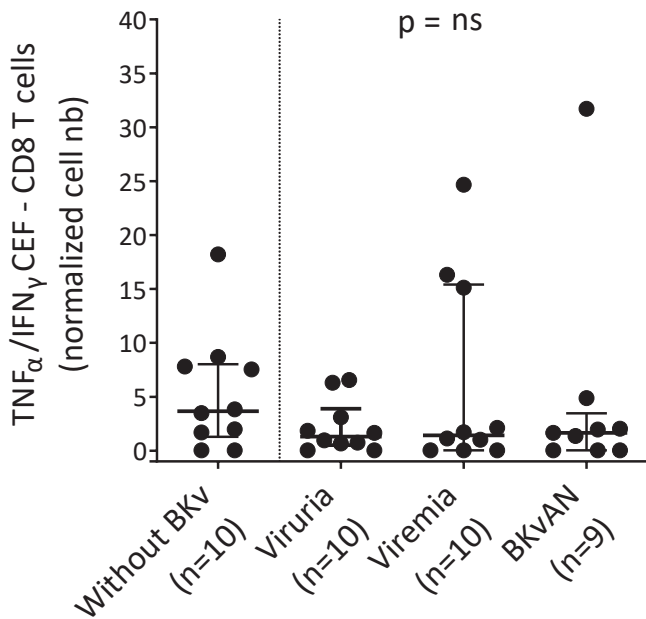

**c**

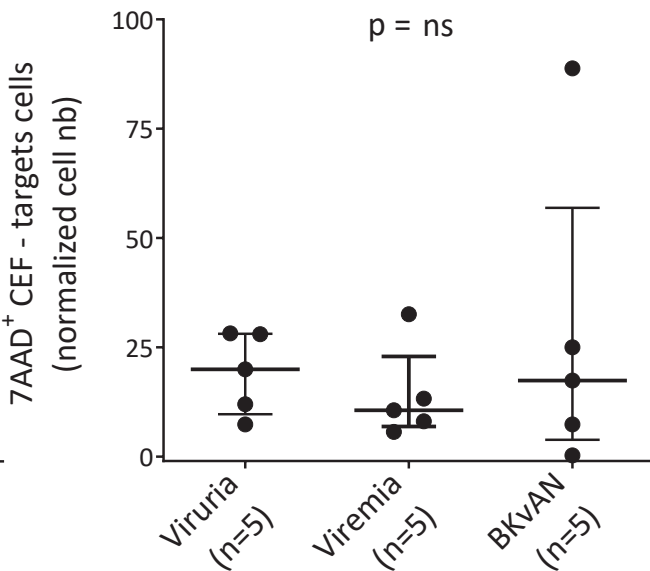

Supplement: Supplementary file 2 [file 3b60e02e7bbcaad2991dda38.pdf]

# Supplementary data: Figure S6

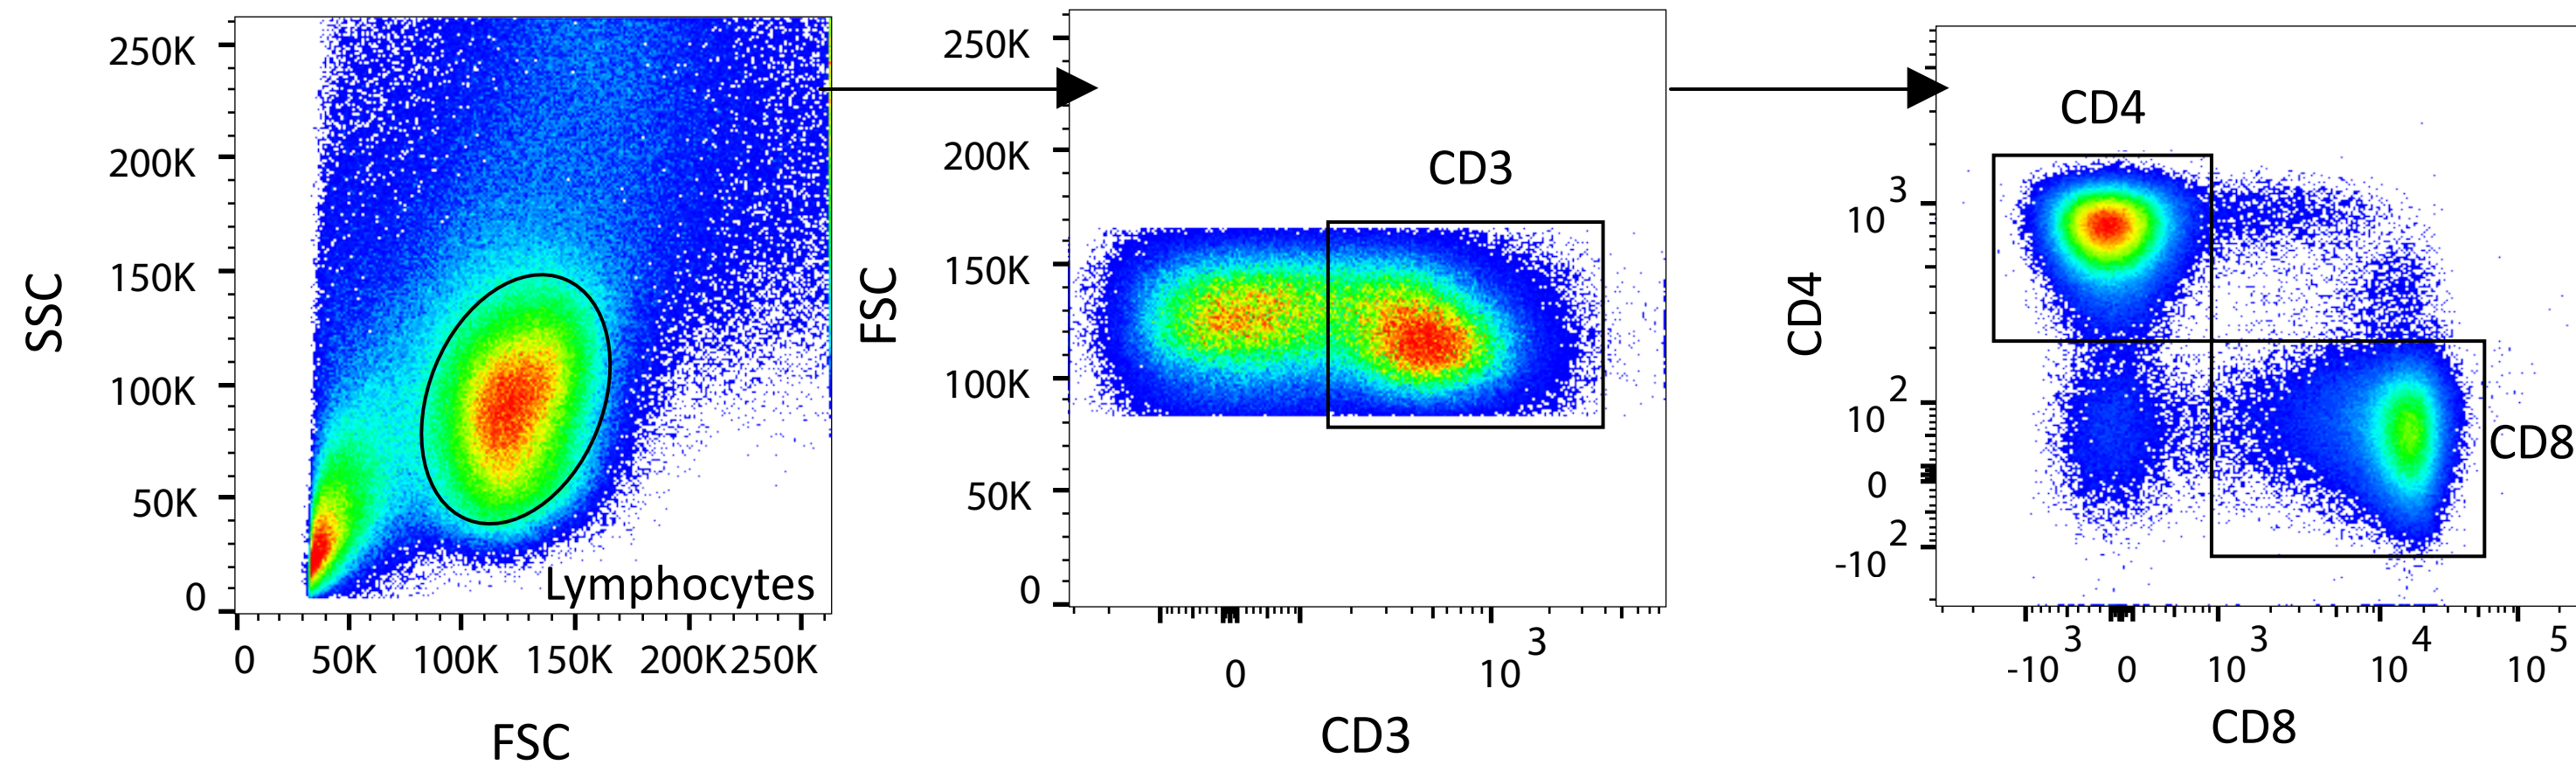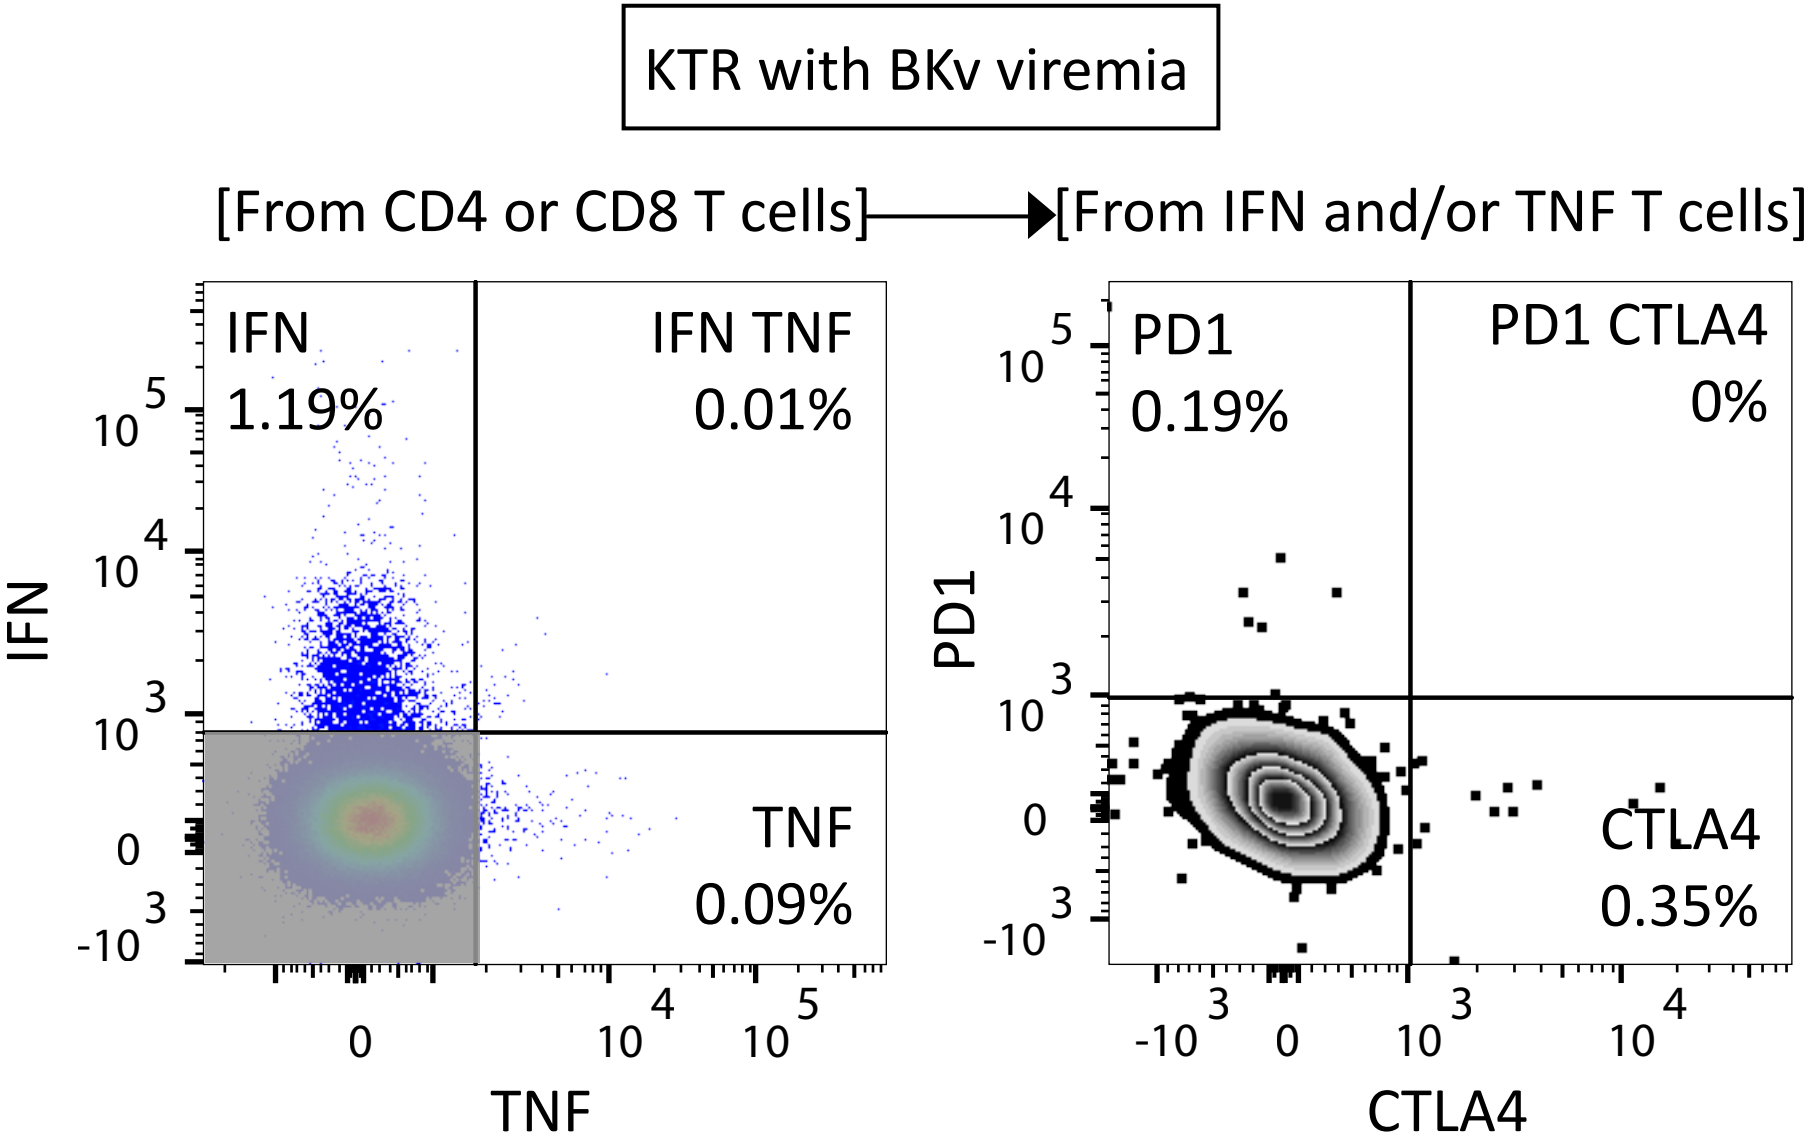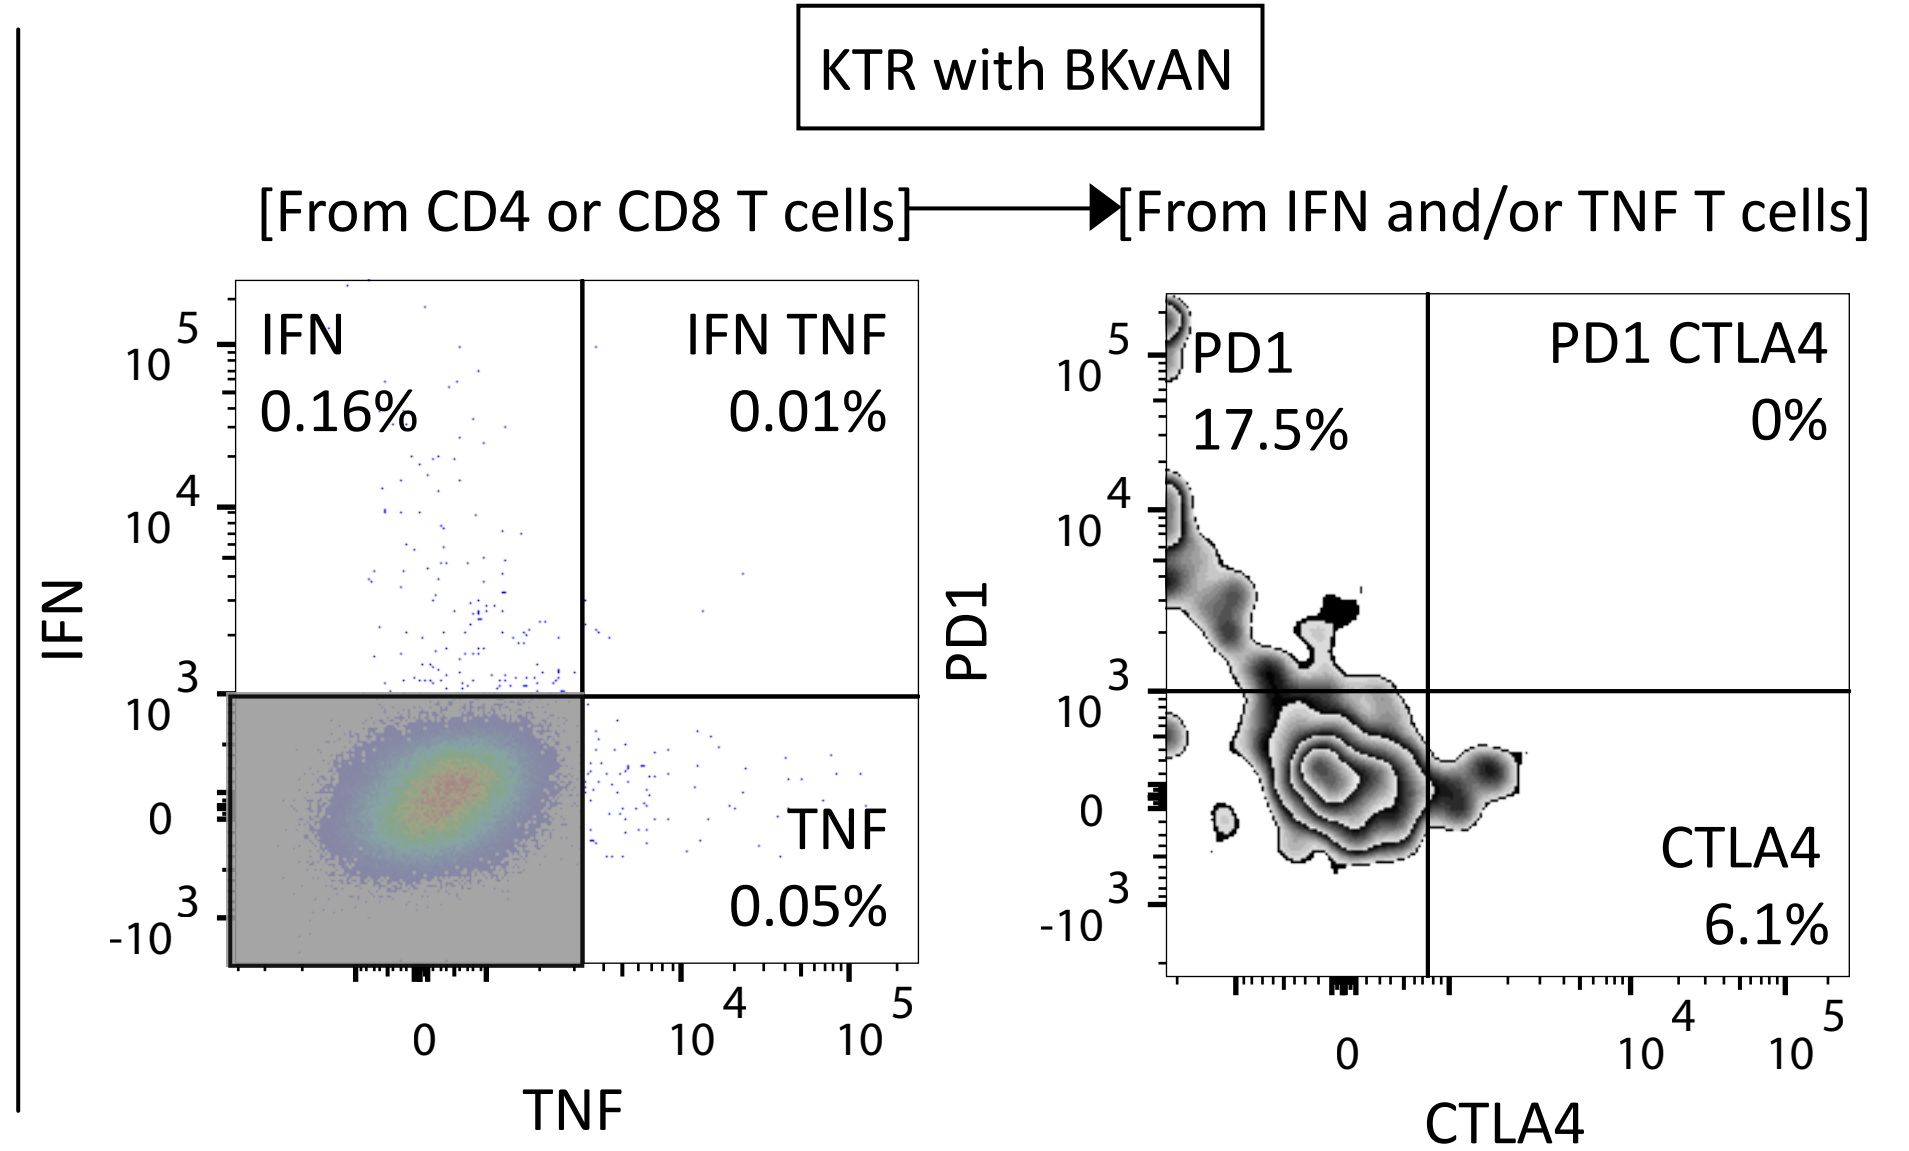

Supplement: Supplementary file 3 [file 3bb13fa89c508d46d9f9d4d0.pdf]

# Supplementary data: Figure S4

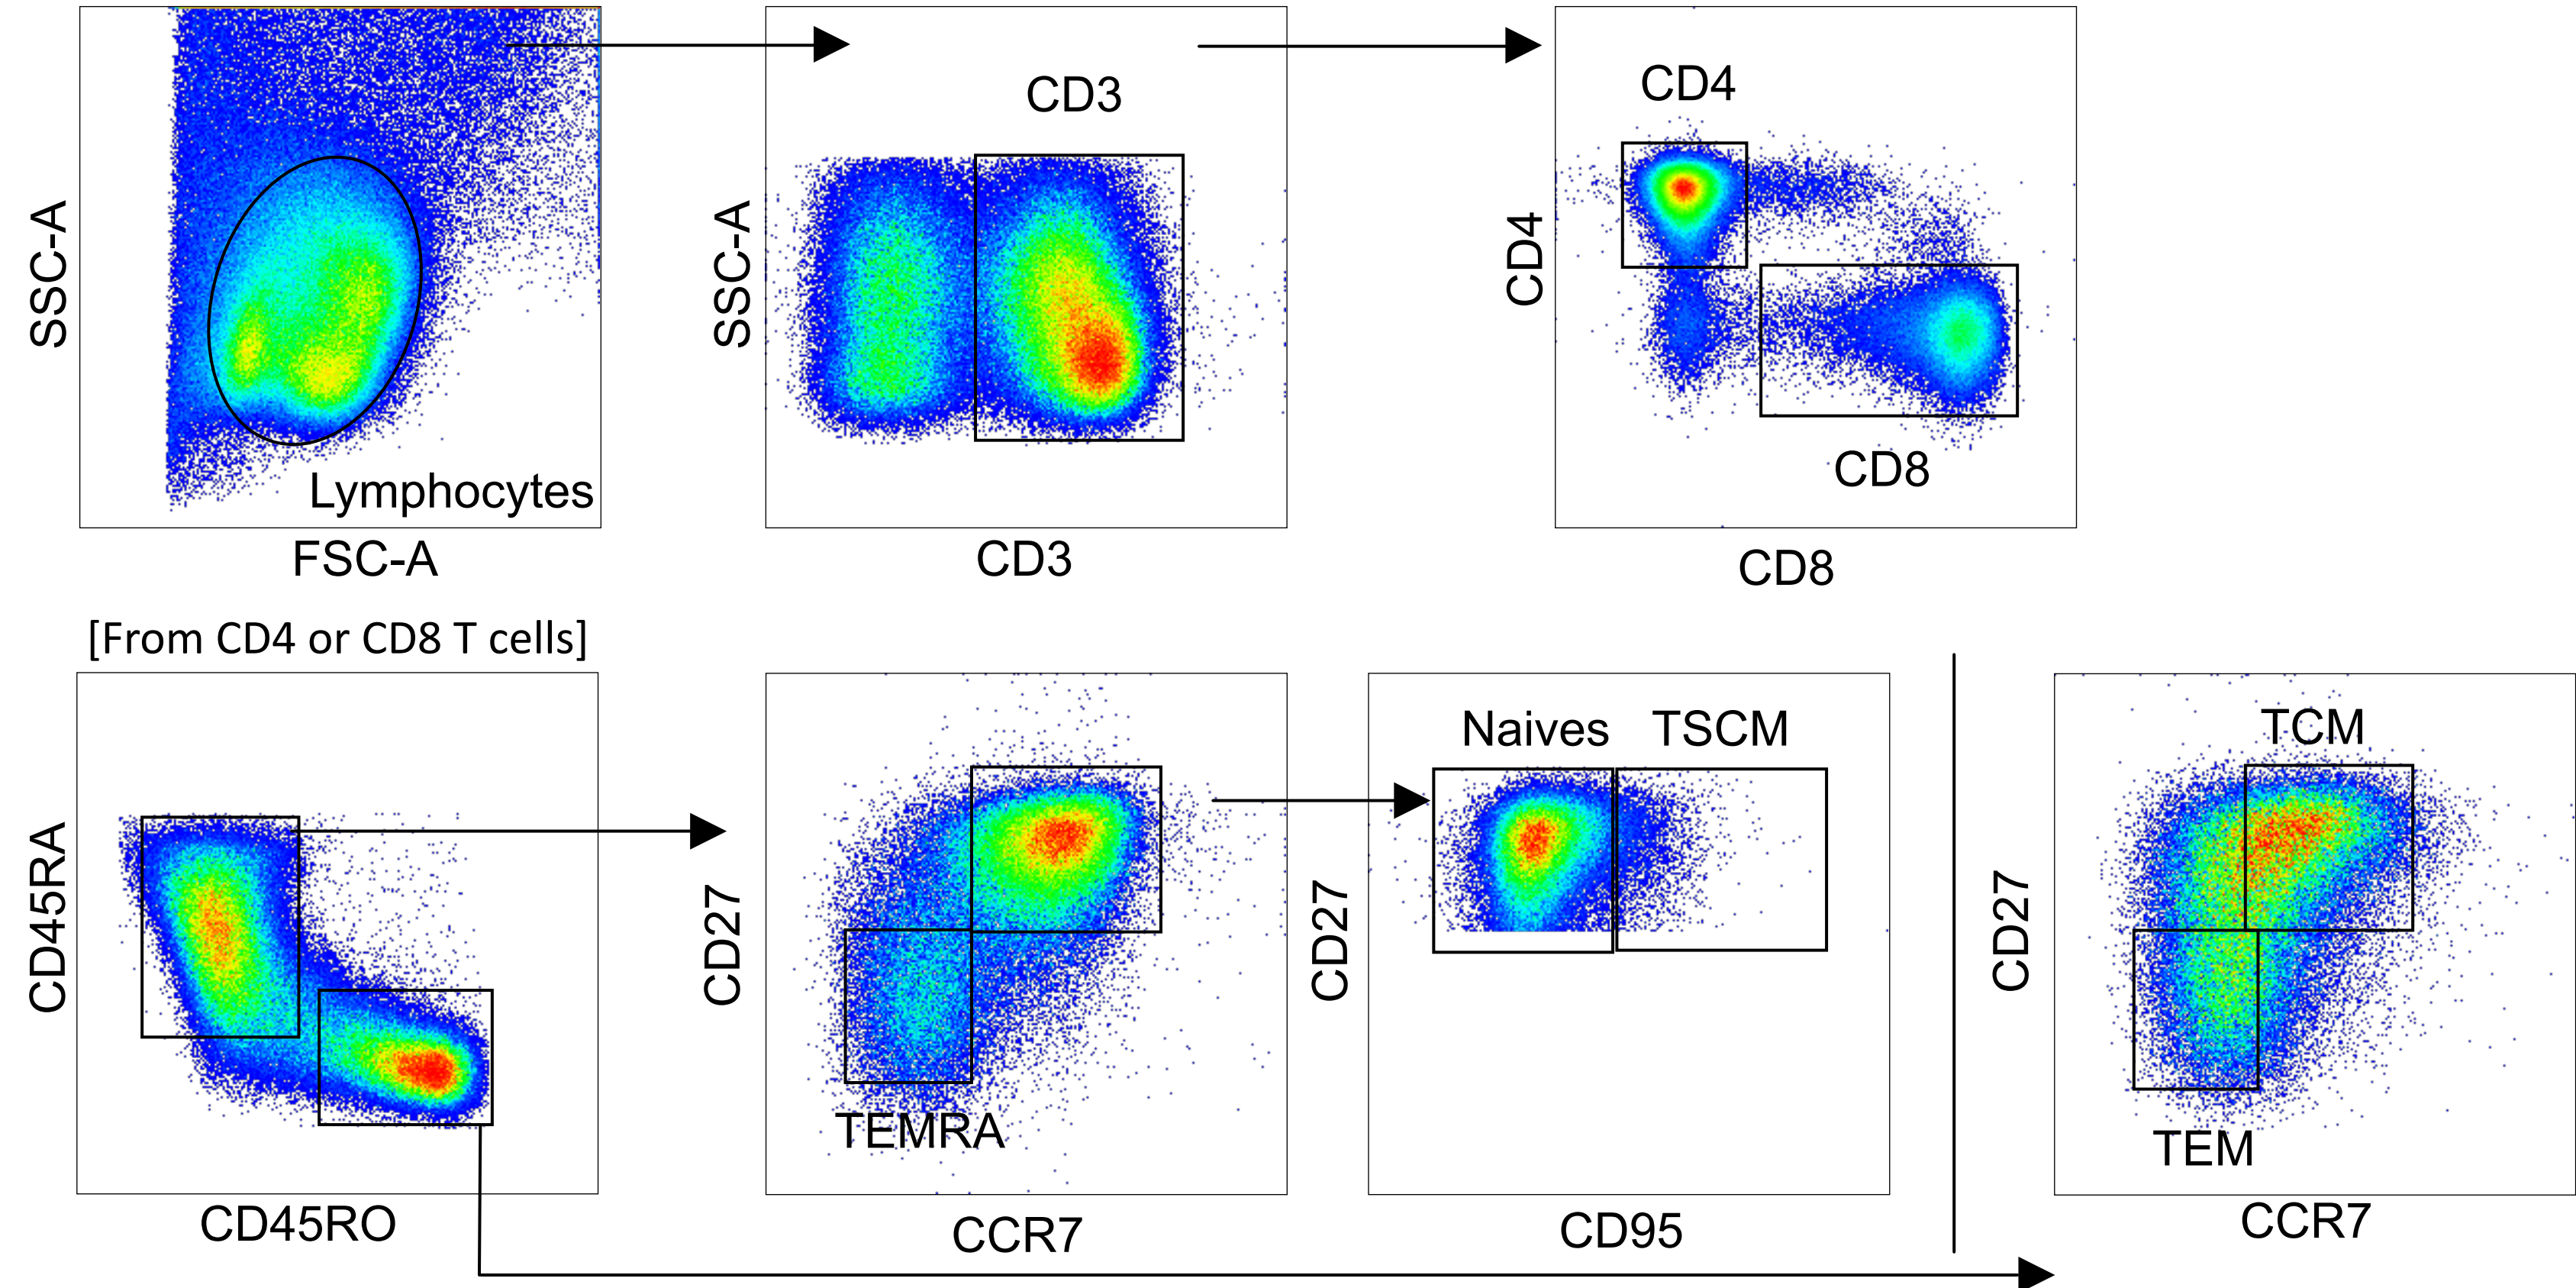

Supplement: Supplementary file 4 [file 53d6f2902be5b12589c89f57.pdf]

# Supplementary data: Figure S1

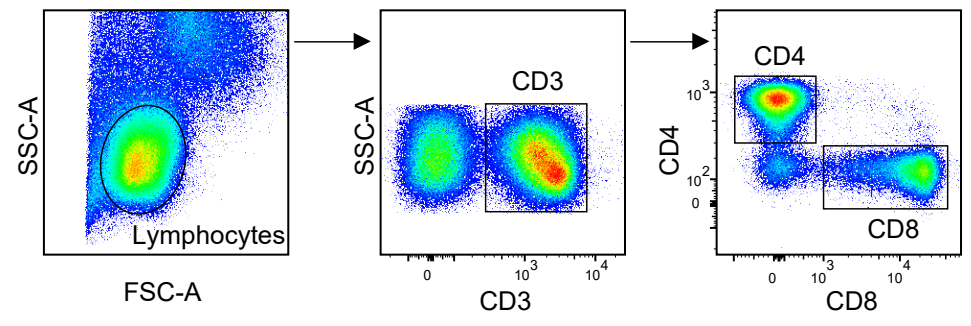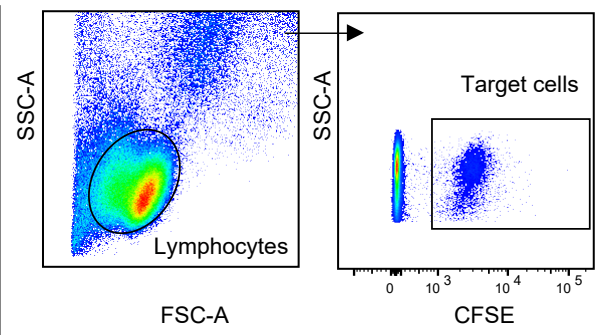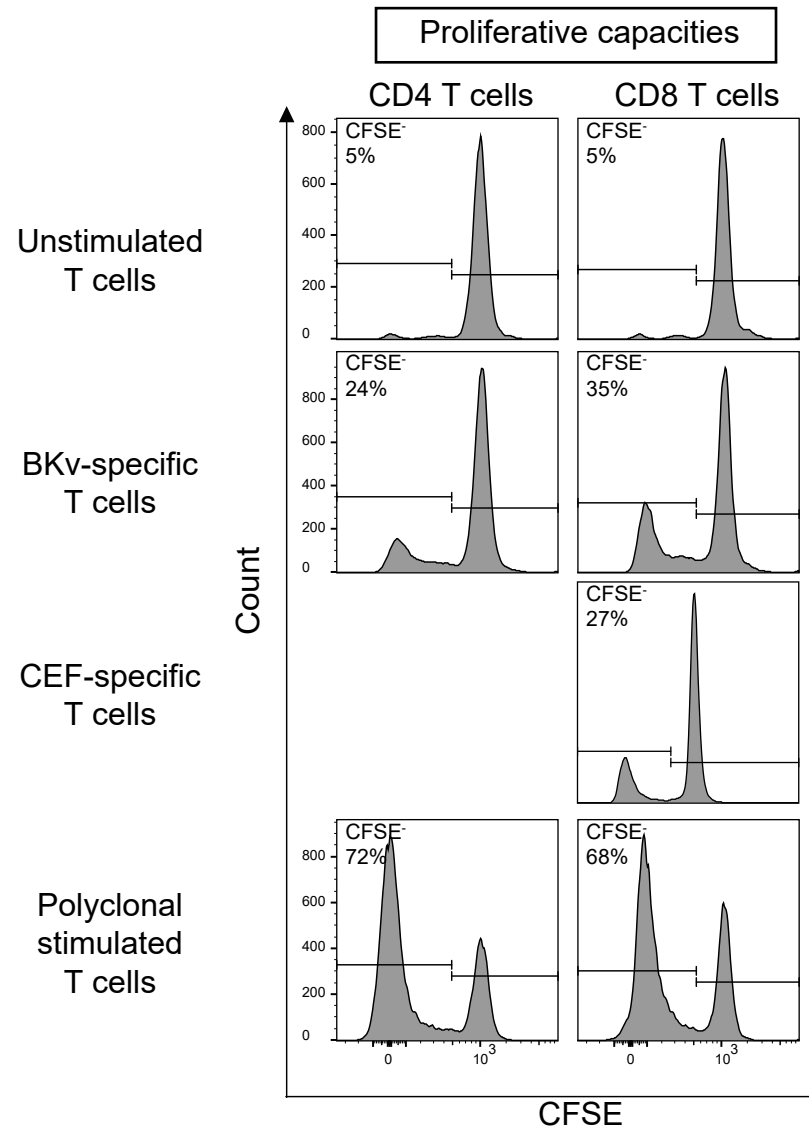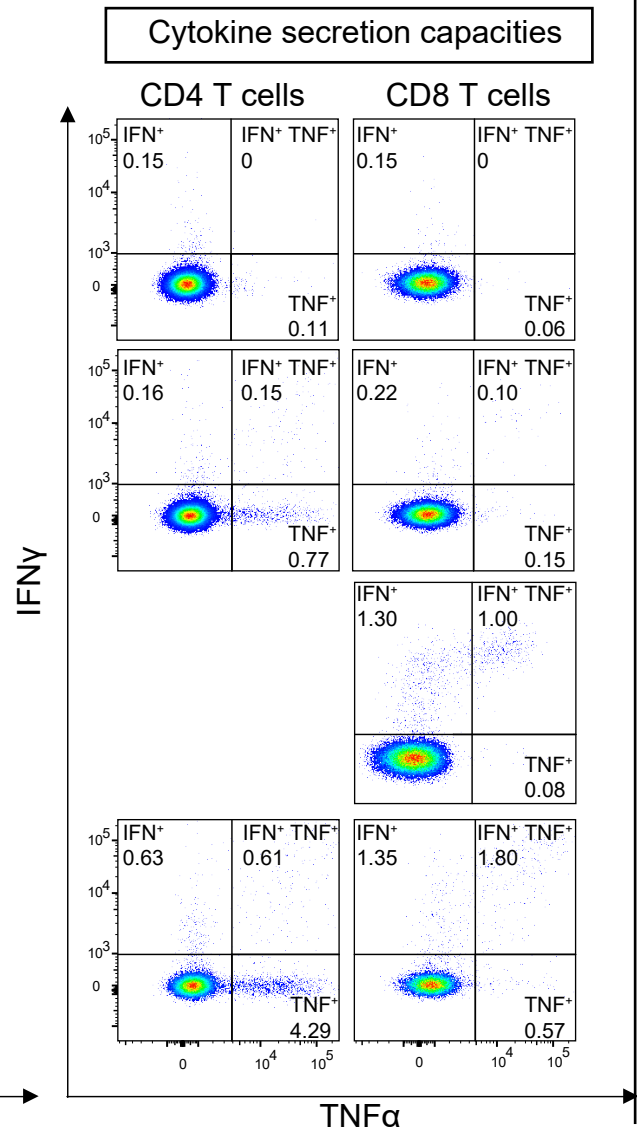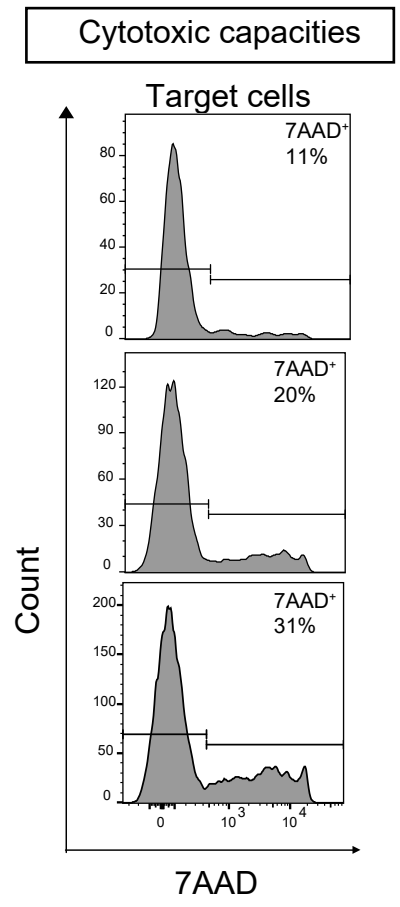

Supplement: Supplementary file 9 [file fc1c3bb441d487bb1118f1ef.pdf]
